# Supplementary material
Source: Elsevier journal article supplement (https://www.sciencedirect.com/science/article/pii/S2531043722000162)
Supplement: mmc1 [file S2531043722000162:mmc1.docx]

**Appendix 1**

**Search Strategy**

Pubmed/MEDLINE search strategy: MESH, title and abstract

((“chronic obstructive pulmonary disease”[Title/Abstract] OR COPD[Title/Abstract] OR emphysema[Title/Abstract] OR “chronic bronchitis”[Title/Abstract]) AND (unsupervised[Title/Abstract] OR “non-supervised”[Title/Abstract] OR unmonitored[Title/Abstract] OR “self-management”[Title/Abstract] OR counselling[Title/Abstract] OR “non-health* professional*”[Title/Abstract]) AND (“physical activity”[Title/Abstract] OR “physical exercise”[Title/Abstract] OR exercise[Title/Abstract] OR training[Title/Abstract] OR “exercise training”[Title/Abstract] OR “exercise program*”[Title/Abstract] OR “aerobic training”[Title/Abstract] OR balance[Title/Abstract] OR walking[Title/Abstract] OR run*[Title/Abstract] OR *cycl*[Title/Abstract] OR swimming[Title/Abstract] OR water[Title/Abstract] OR strength[Title/Abstract] OR endurance[Title/Abstract] OR “flexibility”[Title/Abstract] OR “mobility”[Title/Abstract] OR “resistance”[Title/Abstract] OR “neuromotor”[Title/Abstract] OR “stretch”[Title/Abstract] OR “activities of daily living”[Title/Abstract] OR ADL[Title/Abstract] OR “daily activit*”[Title/Abstract] OR gardening[Title/Abstract] OR horticulture[Title/Abstract] OR danc*[Title/Abstract] OR yoga[Title/Abstract] OR pilates[Title/Abstract] OR “tai-chi”[Title/Abstract] OR “whole-body vibration”[Title/Abstract] OR pedometer[Title/Abstract] OR “pedometer-based”[Title/Abstract] OR “daily step*”[Title/Abstract] OR “Nordic walking”[Title/Abstract] OR jogging[Title/Abstract]) AND (outpatient[Title/Abstract] OR community[Title/Abstract] OR “home-based”[Title/Abstract] OR home[Title/Abstract])) OR (((“Pulmonary Disease, Chronic Obstructive” OR emphysema OR “Bronchitis, Chronic”)[MeSH Terms]) AND ((Exercise OR Walking OR Swimming OR Running OR Water OR Pliability OR “Activities of Daily Living” OR gardening OR dancing OR yoga OR jogging)[MeSH Terms]) AND ((Outpatients OR “Residence Characteristics”)[MeSH Terms])))

SCOPUS search strategy: title, abstract, keywords

TITLE-ABS-KEY ( "chronic obstructive pulmonary disease" OR “COPD” OR “emphysema” OR "chronic bronchitis" ) AND TITLE-ABS-KEY (“unsupervised” OR "non-supervised" OR “unmonitored” OR "self-management" OR “counselling” OR "non-health* professional*”) AND TITLE-ABS-KEY ("physical activity" OR "physical exercise" OR “exercise” OR “training” OR "exercise training" OR "exercise program*" OR "aerobic training" OR “balance” OR “walking” OR “run*” OR “*cycl*” OR “swimming” OR “water” OR “strength” OR “endurance” OR “flexibility” OR “mobility” OR “resistance” OR “neuromotor” OR “stretch” OR "activities of daily living" OR “ADL” OR "daily activit*" OR “gardening” OR “horticulture” OR “danc*” OR “yoga” OR “pilates” OR "tai-chi" OR "whole-body vibration" OR “pedometer” OR "pedometer-based" OR "daily step*" OR "Nordic walking" OR “jogging”) AND TITLE-ABS-KEY (“outpatient” OR “community” OR "home-based" OR “home”)

Web of Science search strategy: title, abstract, keywords

TS=((“chronic obstructive pulmonary disease” OR “COPD” OR “emphysema” OR “chronic bronchitis”) AND (“unsupervised” OR “non-supervised” OR “unmonitored” OR “self-management” OR “counselling” OR “non-health* professional*”) AND (“physical activity” OR “physical exercise” OR “exercise” OR “training” OR “exercise training” OR “exercise program*” OR “aerobic training” OR “balance” OR “walking” OR “run*” OR “*cycl*” OR “swimming” OR “water” OR “strength” OR “endurance” OR “flexibility” OR “mobility” OR “resistance” OR “neuromotor” OR “stretch” OR “activities of daily living” OR “ADL” OR “daily activit*” OR “gardening” OR “horticulture” OR “danc*” OR “yoga” OR “pilates” OR “tai-chi” OR “whole-body vibration” OR “pedometer” OR “pedometer-based” OR “daily step*” OR “Nordic walking” OR “jogging”) AND (“outpatient” OR “community” OR “home-based” OR “home”))

COCHRANE search strategy: title, abstract, keywords

(“chronic obstructive pulmonary disease” OR “COPD” OR “emphysema” OR “chronic bronchitis”) AND (“unsupervised” OR “non-supervised” OR “unmonitored” OR “self-management” OR “counselling” OR “non-health* professional*”) AND (“physical activity” OR “physical exercise” OR “exercise” OR “training” OR “exercise training” OR “exercise program*” OR “aerobic training” OR “balance” OR “walking” OR “run*” OR “*cycl*” OR “swimming” OR “water” OR “strength” OR “endurance” OR “flexibility” OR “mobility” OR “resistance” OR “neuromotor” OR “stretch” OR “activities of daily living” OR “ADL” OR “daily activit*” OR “gardening” OR “horticulture” OR “danc*” OR “yoga” OR “pilates” OR “tai-chi” OR “whole-body vibration” OR “pedometer” OR “pedometer-based” OR “daily step*” OR “Nordic walking” OR “jogging”) AND (“outpatient” OR “community” OR “home-based” OR “home”):ti,ab,kw

EBSCOhost search strategy: title and abstract

(TI (“chronic obstructive pulmonary disease” OR “COPD” OR “emphysema” OR “chronic bronchitis”) AND (“unsupervised” OR “non-supervised” OR “unmonitored” OR “self-management” OR “counselling” OR “non-health* professional*”) OR AB (“chronic obstructive pulmonary disease” OR “COPD” OR “emphysema” OR “chronic bronchitis”) AND (“unsupervised” OR “non-supervised” OR “unmonitored” OR “self-management” OR “counselling” OR “non-health* professional*”)) AND (TI (“physical activity” OR “physical exercise” OR “exercise” OR “training” OR “exercise training” OR “exercise program*” OR “aerobic training” OR “balance” OR “walking” OR “run*” OR “*cycl*” OR “swimming” OR “water” OR “strength” OR “endurance” OR “flexibility” OR “mobility” OR “resistance” OR “neuromotor” OR “stretch” OR “activities of daily living” OR “ADL” OR “daily activit*” OR “gardening” OR “horticulture” OR “danc*” OR “yoga” OR “pilates” OR “tai-chi” OR “whole-body vibration” OR “pedometer” OR “pedometer-based” OR “daily step*” OR “Nordic walking” OR “jogging”) OR AB (“physical activity” OR “physical exercise” OR “exercise” OR “training” OR “exercise training” OR “exercise program*” OR “aerobic training” OR “balance” OR “walking” OR “run*” OR “*cycl*” OR “swimming” OR “water” OR “strength” OR “endurance” OR “flexibility” OR “mobility” OR “resistance” OR “neuromotor” OR “stretch” OR “activities of daily living” OR “ADL” OR “daily activit*” OR “gardening” OR “horticulture” OR “danc*” OR “yoga” OR “pilates” OR “tai-chi” OR “whole-body vibration” OR “pedometer” OR “pedometer-based” OR “daily step*” OR “Nordic walking” OR “jogging”)) AND (TI (“outpatient” OR “community” OR “home-based” OR “home”) OR AB (“outpatient” OR “community” OR “home-based” OR “home”))

**Table S1 -** Quality assessment of the studies included, based on the Quality assessment tool for quantitative studies1.

| Study | Selection bias | Study design | Confounders | Blinding | Data collection method | Withdrawals and dropouts | Global rating |
| --- | --- | --- | --- | --- | --- | --- | --- |
| McGavin et al, 19772 | 3 | 1 | 1 | 3 | 1 | 1 | **3** |
| Elçi et al, 20083 | 2 | 1 | 1 | 3 | 1 | 3 | **3** |
| Moore et al, 20094 | 2 | 1 | 1 | 3 | 1 | 2 | **2** |
| Ho et al, 20125 | 2 | 1 | 1 | 2 | 1 | 2 | **1** |
| Mitchell et al, 20146 | 2 | 1 | 1 | 2 | 1 | 1 | **1** |
| Cameron-Tucker et al, 20167 | 3 | 1 | 1 | 3 | 1 | 2 | **3** |
| Coultas et al, 20168 | 1 | 1 | 1 | 2 | 1 | 2 | **1** |
| Chen et al, 20189 | 2 | 1 | 1 | 3 | 1 | 1 | **2** |
| Coultas et al, 201810 | 1 | 1 | 1 | 2 | 1 | 2 | **1** |
| Lin et al, 201911 | 2 | 1 | 1 | 3 | 1 | 1 | **3** |
| Lahham et al, 202012 | 3 | 1 | 1 | 2 | 1 | 2 | **2** |

**Legend:** 1, strong quality; 2, moderate quality; 3, weak quality.

**References:**

1. Effective Public Health Practice Project. *Quality Assessment Tool For Quantitative Studies.* Hamilton, ON1998.

2. McGavin C, Gupta S, Lloyd E, McHardy G. Physical rehabilitation for the chronic bronchitic: results of a controlled trial of exercises in the home. *Thorax.* 1977;32(3):307-311.

3. ElçI A, BÖREKÇI Ş, Ovayolu N, Elbek O. The efficacy and applicability of a pulmonary rehabilitation programme for patients with COPD in a secondary‐care community hospital. *Respirology.* 2008;13(5):703-707.

4. Moore J, Fiddler H, Seymour J, et al. Effect of a home exercise video programme in patients with chronic obstructive pulmonary disease. *Journal of Rehabilitation Medicine.* 2009;41(3):195-200.

5. Ho C-F, Maa S-H, Shyu Y-IL, Lai Y-T, Hung T-C, Chen H-C. Effectiveness of paced walking to music at home for patients with COPD. *COPD: Journal of Chronic Obstructive Pulmonary Disease.* 2012;9(5):447-457.

6. Mitchell KE, Johnson-Warrington V, Apps LD, et al. A self-management programme for COPD: a randomised controlled trial. *European Respiratory Journal.* 2014;44(6):1538-1547.

7. Cameron-Tucker HL, Wood-Baker R, Joseph L, Walters JA, Schüz N, Walters EH. A randomized controlled trial of telephone-mentoring with home-based walking preceding rehabilitation in COPD. *International journal of chronic obstructive pulmonary disease.* 2016;11:1991.

8. Coultas DB, Jackson BE, Russo R, et al. A lifestyle physical activity intervention for patients with chronic obstructive pulmonary disease. A randomized controlled trial. *Annals of the American Thoracic Society.* 2016;13(5):617-626.

9. Chen Y, Niu Me, Zhang X, Qian H, Xie A, Wang X. Effects of home‐based lower limb resistance training on muscle strength and functional status in stable Chronic obstructive pulmonary disease patients. *Journal of clinical nursing.* 2018;27(5-6):e1022-e1037.

10. Coultas DB, Jackson BE, Russo R, et al. Home-based physical activity coaching, physical activity, and health care utilization in chronic obstructive pulmonary disease. Chronic obstructive pulmonary disease self-management activation research trial secondary outcomes. *Annals of the American Thoracic Society.* 2018;15(4):470-478.

11. Lin FL, Yeh ML, Lai YH, Lin KC, Yu CJ, Chang JS. Two‐month breathing‐based walking improves anxiety, depression, dyspnoea and quality of life in chronic obstructive pulmonary disease: A randomised controlled study. *Journal of clinical nursing.* 2019;28(19-20):3632-3640.

12. Lahham A, McDonald CF, Moore R, et al. The impact of home‐based pulmonary rehabilitation on people with mild chronic obstructive pulmonary disease: A randomised controlled trial. *The Clinical Respiratory Journal.* 2020;14(4):335-344.
